## RESEARCH ARTICLE

# The effectiveness of parathyroid gland autotransplantation in preserving parathyroid function during thyroid surgery for thyroid neoplasms: A meta-analysis

Bin Wang<sup>1</sup> , Chun-Rong Zhu<sup>2,3</sup> , Hong Liu<sup>1</sup>, Jian Wu<sup>1</sup> \*

**1** Department of Thyroid and Breast Surgery, The Third People's Hospital of Chengdu, Chengdu, Sichuan, China, **2** Sichuan Key Laboratory of Medical Imaging, Department of Radiology, Affiliated Hospital of North Sichuan Medical College, Nanchong, Sichuan, China, **3** Department of Chemistry, School of Basic Medical Science, North Sichuan Medical College, Nanchong, China

 These authors contributed equally to this work.

\* [wo\\_doctor@163.com](mailto:wo_doctor@163.com)

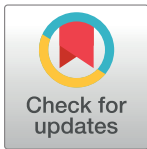

## OPEN ACCESS

**Citation:** Wang B, Zhu C-R, Liu H, Wu J (2019) The effectiveness of parathyroid gland autotransplantation in preserving parathyroid function during thyroid surgery for thyroid neoplasms: A meta-analysis. *PLoS ONE* 14(8): e0221173. <https://doi.org/10.1371/journal.pone.0221173>

**Editor:** Biniam Kidane, University of Manitoba, CANADA

**Received:** March 31, 2019

**Accepted:** July 31, 2019

**Published:** August 14, 2019

**Copyright:** © 2019 Wang et al. This is an open access article distributed under the terms of the [Creative Commons Attribution License](https://creativecommons.org/licenses/by/4.0/), which permits unrestricted use, distribution, and reproduction in any medium, provided the original author and source are credited.

**Data Availability Statement:** All relevant data are within the paper and its Supporting Information files.

**Funding:** This study was supported by the Scientific Research Fund of the Department of Science and Technology of Chengdu City (2015-HM01-00376-SF) to JW.

**Competing interests:** The authors have declared that no competing interests exist.

## Abstract

### Objective

We conducted this meta-analysis to assess the effectiveness of parathyroid gland autotransplantation in preserving parathyroid function during thyroid surgery for thyroid neoplasms.

### Methods

We conducted a search by using PubMed, Embase, and the Cochrane Library electronic databases for studies that were published up to January 2019. The reference lists of the retrieved articles were also reviewed. Two authors independently assessed the methodological quality and extracted the data. A random-effects model was used to calculate the overall combined risk estimates. Publication bias was evaluated with a funnel plot using Egger's and Begg's tests.

### Results

A total of 25 independent studies involving 10,531 participants were included in the meta-analysis. Compared with patients who did not undergo parathyroid gland autotransplantation, the overall pooled relative risks for patients who underwent parathyroid gland autotransplantation were 1.75 (95% CI: 1.51–2.02,  $p < 0.001$ ) for postoperative hypoparathyroidism, 1.72 (95% CI: 1.45–2.05,  $p < 0.001$ ) for protracted hypoparathyroidism, 1.06 (95% CI: 0.44–2.58,  $p = 0.894$ ) and 0.71 (95% CI: 0.22–2.29,  $p = 0.561$ ) for biochemical hypoparathyroidism and biochemical hypocalcemia at 6 months postoperatively, respectively, and 1.89 (95% CI: 1.33–2.69,  $p < 0.001$ ) and 0.22 (95% CI: 0.09–0.52,  $p = 0.001$ ) for biochemical hypoparathyroidism and biochemical hypocalcemia at 12 months postoperatively, respectively. The pooled relative risks for patients who underwent one parathyroid gland autotransplantation

and patients who underwent two or more parathyroid gland autotransplantations were 1.71 (95% CI: 1.25–2.35,  $p = 0.001$ ) and 2.22 (95% CI: 1.43–3.45,  $p < 0.001$ ) for postoperative hypoparathyroidism, 1.09 (95% CI: 0.59–2.01,  $p = 0.781$ ) and 0.55 (95% CI: 0.16–1.87,  $p = 0.341$ ) for hypoparathyroidism at 6 months postoperatively compared with those of patients who did not undergo parathyroid gland autotransplantation.

## Conclusions

Parathyroid gland autotransplantation is significantly associated with increased risk of postoperative and protracted hypoparathyroidism, and the number of autoplasmic parathyroid glands is positively correlated with the incidence of postoperative hypoparathyroidism.

## Introduction

The incidence of thyroid carcinoma has been increasing globally for a variety of reasons[1–8]. As the primary therapy method for thyroid carcinoma, surgery is associated with some complications. Hypoparathyroidism is one of the main complications. The incidence of transient hypoparathyroidism was 17%–55.7%, and the incidence of permanent hypoparathyroidism varied from 0 to 16.2% across different studies[9–11]. Hypoparathyroidism was the result of injury to the parathyroid glands from trauma, devascularization, or unintentional removal[12, 13]. This complication may prolong hospitalization, lead to readmission and increase the overall costs of thyroid surgery[14–16].

Parathyroid gland autotransplantation(PGA) has been widely used to preserve parathyroid function in recent decades[16–21]. Some researchers have advocated routine PGA to protect its function[22–24]. However, some studies have demonstrated that PGA increases the risk of postoperative hypoparathyroidism[25–28]. Some studies have reported that PGA increases the incidence of transient hypoparathyroidism but does not affect the incidence of permanent hypoparathyroidism[16, 29–31]. Although Iorio and his colleague[32] conducted a systematic review that focused on the aspects of the PGA procedure, indications, technique and results, these researchers only summarized and described the studies and did not perform a statistical analysis. In general, there is still no agreement on the relationship between hypoparathyroidism and PGA. Therefore, we conducted this meta-analysis to assess the effectiveness of PGA in preserving parathyroid function.

## Methods

### Search strategy

We attempted to follow the proposed Meta-Analysis of Observational Studies in Epidemiology (MOOSE) guidelines[33] to conduct the present meta-analysis. We conducted a search by using PubMed, Embase, and the Cochrane Library electronic databases for studies that were published up to January 2019. The following search terms were used in all fields as a search strategy: 1) transplantation, autologous, autograft, autografts, autologous transplantation, autologous transplantations, (Transplantations, Autologous), autotransplant, autotransplants, autotransplantation, autotransplantations, autografting, and autograftings; 2) parathyroid glands, parathyroid gland, (gland, parathyroid), (glands, parathyroid), and parathyroid; 3) thyroidectomy, thyroidectomies, thyroid gland excision, excision of thyroid gland, surgery, surgeries, operation, operations, (surgical procedures, operative), operative surgical procedure,

operative surgical procedures, (procedures, operative surgical), (surgical procedure, operative), operative procedures, operative procedure, (procedure, operative), (procedures, operative), (procedure, operative surgical), and operative therapy; and 4) thyroid neoplasms, (neoplasm, thyroid), thyroid neoplasm, (neoplasms, thyroid), thyroid carcinoma, (carcinoma, thyroid), (carcinomas, thyroid), thyroid carcinomas, cancer of thyroid, thyroid cancers, thyroid cancer, (cancer, thyroid), (cancers, thyroid), cancer of the thyroid, thyroid adenoma, (adenoma, thyroid), (adenomas, thyroid), and thyroid adenomas. No restrictions were imposed. In addition, we reviewed the reference lists of the retrieved papers and recent reviews.

## Study selection

We first performed an initial screening of the titles and abstracts. A second screening was performed based on the full-text review. Studies were considered eligible if they met the following criteria: 1) the study was published in English; 2) the thyroid surgery in the study was the initial surgery; 3) the minimal scope of the surgery in the study was near-total thyroidectomy; 4) the exposure of interest included PGA; 5) the outcome of interest was the incidence of hypoparathyroidism and/or hypocalcemia; and 6) relative risk (RR) and the corresponding 95% confidence interval (CI) (or data to calculate these values) were reported. Studies were excluded based on the following criteria: 1) those including thyroidectomy for multiple endocrine neoplasia; 2) those including thyroidectomy for parathyroid adenoma, coincident with thyroid carcinoma or not; and 3) those in which the full text of the studies could not be accessed online or by request to the authors.

## Data extraction and quality assessment

Data extraction was then performed by using a standardized data-collection form. Data were collected as follows: the first author, year of publication, type of study, country of origin, study period, duration of follow-up, sample size and the number of cases and controls, surgical approach, method and site of PGA, number of patients with different numbers of autoplasmic parathyroid glands, evaluation indexes of hypoparathyroidism and hypocalcemia, number of patients with hypoparathyroidism or hypocalcemia after surgery, and RR and the corresponding 95% confidence interval. The quality of retrospective and prospective cohort studies and case-control studies was assessed with the Newcastle-Ottawa Scale (NOS)[34]. The studies with an NOS score  $\geq 6$  were considered high-quality studies. Two authors (WANG B and ZHU CR) independently conducted the study selection, data extraction, and quality assessment. All disagreements in these processes were discussed and resolved by consensus.

## Statistical analyses

Pooled RR was used as a measure of the association between the function of parathyroid glands and PGA across studies. Heterogeneity was quantified statistically with the  $I^2$  test.  $P < 0.1$  and  $I^2 > 50\%$  for heterogeneity were considered significant differences. A random-effects model (DerSimonian-Laird) was used to calculate the pooled RRs for all analyses. If there was heterogeneity, subgroup analysis was conducted according to the different evaluation indexes of hypoparathyroidism. Potential publication bias was assessed by visual inspection of the Egger funnel plots, in which the log RRs were plotted against their SEs. We also performed the Begg rank correlation test[35] and the Egger linear regression test[36] at the  $p < 0.05$  level of significance. All analyses were performed using Stata version 14.0 (Stata Corp LP, College Station, Texas, USA).  $P < 0.05$  was considered statistically significant in all tests.

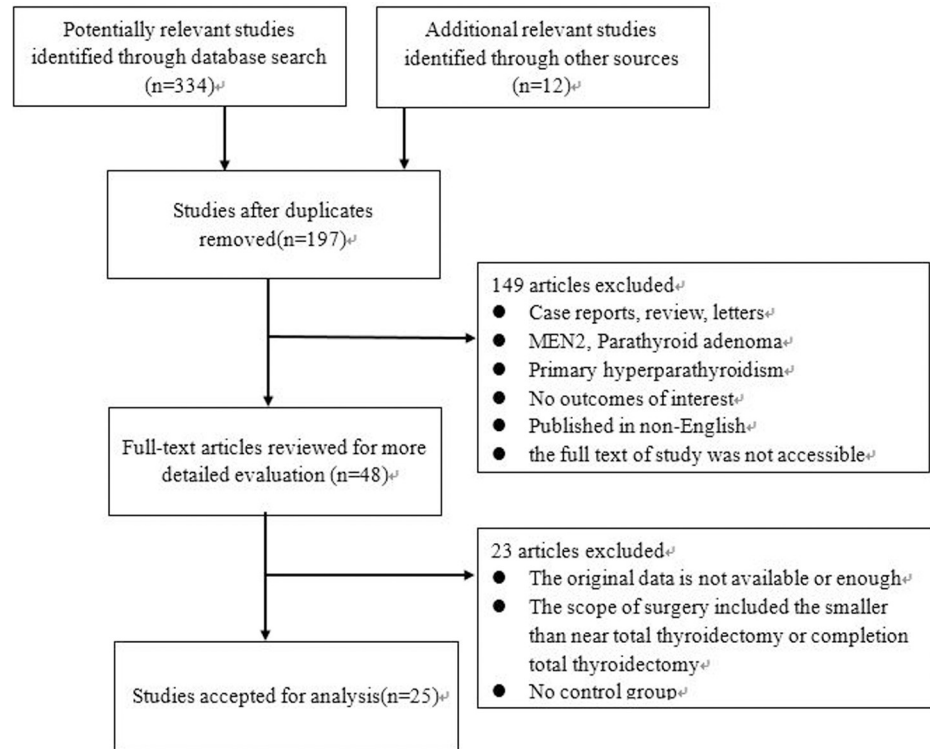

**Fig 1. Flow chart of study selection.**

<https://doi.org/10.1371/journal.pone.0221173.g001>

## Results

### Literature search

The study selection process is shown in Fig 1. Through searching the databases, a total of 346 potentially relevant records were identified, 197 of which were retained after duplicates were removed. After screening the titles and abstracts, 149 studies were excluded for various reasons. The remaining 48 studies were assessed for eligibility via full-text screening, and 23 studies were further excluded. Finally, 25 independent studies were included in the meta-analysis.

### Study characteristics

Table 1 summarizes the basic information of the 25 included eligible studies[9, 10, 16, 19–21, 24, 26–31, 37–48]. These studies were published between 1977 and 2018. Among the 25 studies, there was only one prospective cohort study[19], and the other studies were retrospective cohort studies or case-control studies[9, 10, 16, 20, 21, 24, 26–31, 37–48]. Of the 25 cohort studies, 15 were conducted in Asia, 6 in Europe, 2 in the United States, and 2 in Australia. The sample size of the studies varied from 65 to 1196, and the total study population was 10,531 participants. One study[42] that described the completion of total thyroidectomy was also included because of the detailed information regarding the initial surgery in the study. The evaluation indexes of hypoparathyroidism varied across studies, including biochemical hypoparathyroidism, biochemical hypocalcemia and symptomatic hypocalcemia (the presence of the symptoms of hypocalcemia). The evaluation time ranged from 1 day postoperatively to 12 months postoperatively. Postoperative, protracted and permanent hypoparathyroidism was defined as when the evaluation indexes qualified as hypoparathyroidism when they were

Table 1. Basic characteristics of the included studies.

| authors                  | year | study design | country           | duration       | sample size | age (years old) | follow-up time (months) | surgical method          | sites                   | evaluation times | evaluation indexes                                       |
|--------------------------|------|--------------|-------------------|----------------|-------------|-----------------|-------------------------|--------------------------|-------------------------|------------------|----------------------------------------------------------|
| Salander et al[19].      | 1977 | PC           | Sweden            | 1972.1–1976.4  | 97          | NA              | 6–60                    | TT                       | SCM or AM of the thigh. | 6m               | biochemical hypocalcemia                                 |
| Gann et al [37].         | 1979 | RC           | American          | 1973–1978      | 71          | NA              | 6                       | TT                       | SCM                     | 1d,2m            | biochemical hypocalcemia                                 |
| Kikumori et al[38].      | 1999 | RCC          | Japan             | 1992.1–1996.12 | 104         | NA              | 34                      | TT, TT +BCND             | PMM                     | 1m               | biochemical hypoparathyroidism, biochemical hypocalcemia |
| Palazzo et al [16].      | 2005 | RC           | Australia         | 1998.7–2003.6  | 1196        | NA              | 6                       | TT                       | NA                      | 1d,6m            | biochemical hypocalcemia                                 |
| Abboud et al[9].         | 2008 | RCC          | Lebanon           | 2002.1–2005.6  | 252         | 36–55           | 12–72                   | TT                       | ISCM                    | 1d               | biochemical hypocalcemia                                 |
| Ebrahimi et al[26].      | 2009 | RC           | Australia         | 2004–2005      | 628         | NA              | 6                       | TT                       | SCM                     | 1d,6m            | biochemical hypocalcemia                                 |
| Sokouti et al [40].      | 2010 | RCC          | Iran              | 2002–2006      | 65          | 40.6±10.8       | 6                       | TT, TT +UCND             | DM or SCM               | 1d               | biochemical hypocalcemia                                 |
| Sitges-Serra et al[39].  | 2010 | RCC          | Spain             | 1993–2007      | 425         | 56±15           | 12                      | TT, TT +CND, TT +CND+LND | ISCM                    | 1d,1m,12m        | biochemical hypocalcemia, biochemical hypoparathyroidism |
| Ahmed et al [24].        | 2013 | RC           | Pakistan          | 1998.7–2009.6  | 388         | NA              | 6                       | TT                       | ISCM                    | 1m,6m            | biochemical hypocalcemia                                 |
| Paek et al [41].         | 2013 | RCC          | Republic of Korea | 2003.3–2006.8  | 531         | NA              | 12                      | TT, TT +UCND, TT +BCND   | SCM                     | 2d,12m           | semiotic hypocalcemia                                    |
| Ito et al[42].           | 2014 | RC           | Japan             | 2005.2–2012.6  | 154         | NA              | 12                      | TT, TT +UCND, TT +BCND   | CSCM                    | 12m              | biochemical hypocalcemia                                 |
| Wei et al [20].          | 2014 | RC           | China             | 2007.2–2012.2  | 477         | 14–72           | 23–81                   | TT+BCND                  | CSCM                    | 1d,6m            | biochemical hypoparathyroidism                           |
| Lorente-Poch et al [28]. | 2015 | RC           | Spain             | 1998–2012      | 657         | 12–86           | 12                      | TT, TT +CND, TT +CND+LND | ISCM                    | 1d,1m,12m        | biochemical hypocalcemia, biochemical hypoparathyroidism |
| Uruno et al [45].        | 2016 | RC           | Japan             | 2012.10–2014.9 | 411         | NA              | 12                      | TT+UCND                  | NA                      | 12m              | biochemical hypocalcemia                                 |
| White et al [27].        | 2016 | RC           | American          | 2012.7–2013.12 | 196         | 10–82           | 0.5                     | TT, TT +UCND             | ISCM                    | 2weeks           | semiotic hypocalcemia                                    |
| Tartaglia et al[44].     | 2016 | RC           | Italy             | 2001.1–2010.12 | 244         | NA              | 6                       | TT                       | ISCM                    | 1d,6m            | biochemical hypoparathyroidism, biochemical hypocalcemia |
| Lang et al [43].         | 2016 | RCC          | China             | 2010–2013      | 569         | 52.6 ± 14.2     | 12                      | TT                       | SCM                     | 1d,1m,12m        | biochemical hypocalcemia, biochemical hypoparathyroidism |
| Sonne-Holm et al [29].   | 2017 | RCC          | Denmark           | 2010.1–2015.3  | 575         | 11–95           | 12                      | TT, TT +UCND             | SCM                     | 1d,3m,12m        | biochemical hypoparathyroidism                           |
| Su et al[30].            | 2017 | RCC          | China             | 2013.1–2016.6  | 903         | 43.2±13.9       | 6                       | TT+UCND, TT+BCND         | CSCM                    | 1d,6m            | biochemical hypoparathyroidism                           |
| Kirdak et al [10].       | 2017 | RC           | Turkey            | 2007.1–2015.12 | 122         | 19–71           | 6                       | TT                       | SCM                     | 1d,6m            | biochemical hypoparathyroidism, biochemical hypocalcemia |
| Fama et al [46].         | 2017 | RC           | Italy             | 2013.1–2014.12 | 396         | NA              | 12                      | TT                       | SCM                     | 1d,12m           | biochemical hypocalcemia, semiotic hypocalcemia          |

(Continued)

Table 1. (Continued)

| authors            | year | study design | country | duration        | sample size | age (years old) | follow-up time (months) | surgical method  | sites | evaluation times | evaluation indexes             |
|--------------------|------|--------------|---------|-----------------|-------------|-----------------|-------------------------|------------------|-------|------------------|--------------------------------|
| Su et al[31].      | 2018 | RC           | China   | 2012–2015       | 766         | 19–80           | 24                      | TT+UCND, TT+BCND | CSCM  | 1d,6m            | biochemical hypoparathyroidism |
| Su et al[21].      | 2018 | RC           | China   | 2013.1–2016.6   | 702         | 42.6±12.9       | 6                       | TT+UCND, TT+BCND | CSCM  | 1d,6m            | biochemical hypoparathyroidism |
| Teshima et al[48]. | 2018 | RCC          | Japan   | 2012–2017       | 65          | 17–86           | 6                       | TT+UCND          | SCM   | 1d,6m            | semiotic hypocalcemia          |
| Su et al[47].      | 2018 | RC           | China   | 2014.11–2016.11 | 537         | 17–72           | 6                       | TT+BCND          | SCM   | 6m               | biochemical hypoparathyroidism |

PC prospective cohort study, RC retrospective cohort study, RCC retrospective case-control study, NA not acknowledge, TT total thyroidectomy, CND central lymph node dissection, UCND unilateral central lymph node dissection, BCND bilateral central lymph node dissection, SCM sternocleidomastoid muscle, ISCM ipsilateral sternocleidomastoid muscle, CSCM contralateral sternocleidomastoid muscle, AM adductor muscles, DM deltoid muscle, PMM pectoralis major muscle.

<https://doi.org/10.1371/journal.pone.0221173.t001>

measured 1 month postoperatively, 1 month to 6 months postoperatively, and not less than 6 months postoperatively, respectively. According to the NOS, all the included studies demonstrated relatively high quality, with the distribution of the scores of these studies ranged from six to eight.

### PGA and the risk of postoperative hypoparathyroidism

There were 17 studies[10, 16, 20, 21, 27–31, 37, 39–41, 43, 44, 46, 48] that explored the relationship between PGA and the risk of postoperative hypoparathyroidism. Among them, 3 studies[10, 44, 46] used two different evaluation indexes. Significant heterogeneity was detected ( $I^2 = 79.3\%$ ,  $p < 0.001$ ). The pooled RR from all of these studies was 1.75 (95% CI: 1.51–2.02,  $p < 0.001$ , Fig 2A), and the publication bias as measured by Begg’s and Egger’s tests did not appear to be significant ( $p = 0.183$ ,  $p = 0.138$ ). To address the heterogeneity, we performed a subgroup analysis according to the different evaluation indexes. Weak heterogeneity was observed in the biochemical hypoparathyroidism subgroups, and strong heterogeneity was observed in the biochemical hypocalcemia and symptomatic hypocalcemia subgroups (Fig 2B). The pooled RRs for the biochemical hypoparathyroidism, biochemical hypocalcemia and symptomatic hypocalcemia subgroups were 1.52 (95% CI: 1.37–1.68,  $p < 0.001$ ), 1.92 (95% CI: 1.38–2.68,  $p < 0.001$ ), and 1.94 (95% CI: 1.40–2.68,  $p < 0.001$ ), respectively (Fig 2B).

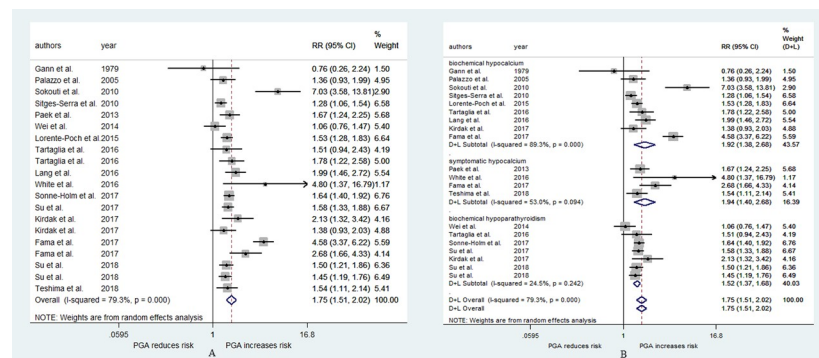

Fig 2. RR for postoperative hypoparathyroidism in patients who underwent PGA vs patients who not underwent PGA. (A) overall relative risks. (B) the relative risk in subgroup of different evaluation indexes.

<https://doi.org/10.1371/journal.pone.0221173.g002>

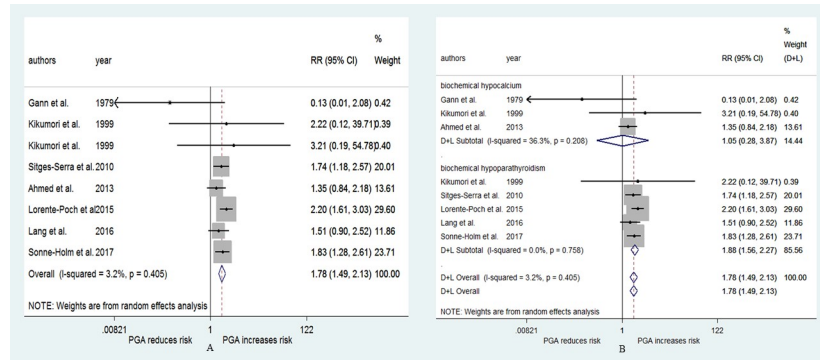

**Fig 3. RR for protracted hypoparathyroidism in patients who underwent PGA vs patients who not underwent PGA. (A) overall relative risks. (B) the relative risk in subgroup of different evaluation indexes.**

<https://doi.org/10.1371/journal.pone.0221173.g003>

### PGA and the risk of protracted hypoparathyroidism

Fig 3A shows the result of the pooled RR for the risk of protracted hypoparathyroidism. Seven studies [24, 28, 29, 37–39, 43] were included in the analysis, of which 1 study [38] used two evaluation indexes. The RRs for the association varied from 0.13 to 3.21 across the studies, while the pooled RR was 1.78 (95% CI: 1.49–2.13,  $p < 0.001$ , Fig 3A). The heterogeneity was weak ( $I^2 = 3.2\%$ ,  $p = 0.405$ ), and the publication bias was not significant (Begg,  $p = 0.536$ ; Egger,  $p = 0.277$ ). The pooled RR in relation to PGA was 1.88 (95% CI: 1.56–2.27,  $p < 0.001$ , Fig 3B) for biochemical hypoparathyroidism and 1.05 (95% CI: 0.28–3.87,  $p = 0.945$ , Fig 3B) for biochemical hypocalcemia. No heterogeneity was observed in the biochemical hypoparathyroidism subgroup (Fig 3B).

### PGA and the risk of permanent hypoparathyroidism

The result that is presented in Fig 4A combines the RRs for the risk of permanent hypoparathyroidism. Nineteen studies [10, 16, 19–21, 24, 28–31, 39, 41–48] were used to generate the result, of which 3 studies [10, 44, 46] used two evaluation indexes. PGA was not associated with the risk of permanent hypoparathyroidism (RR = 0.95, 95% CI: 0.62–1.45,  $p = 0.801$ , Fig 4A), and substantial heterogeneity was observed ( $I^2 = 62.0\%$ ,  $p < 0.001$ , Fig 4A). After performing the subgroup analysis, we found the same result that PGA was not related to the risk of permanent hypoparathyroidism (biochemical hypoparathyroidism RR = 1.44, 95% CI: 0.88–2.35,

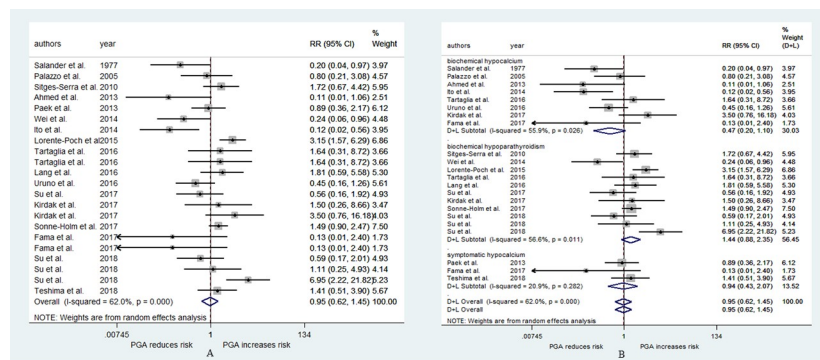

**Fig 4. RR for permanent hypoparathyroidism in patients who underwent PGA vs patients who not underwent PGA. (A) overall relative risks. (B) the relative risk in subgroup of different evaluation indexes.**

<https://doi.org/10.1371/journal.pone.0221173.g004>

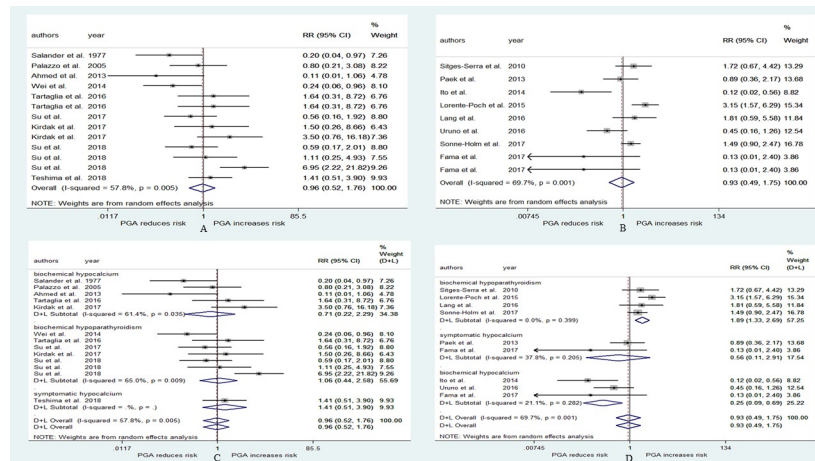

**Fig 5. RR for hypoparathyroidism at postoperative 6 and 12 months in patients who underwent PGA vs patients who not underwent PGA.** (A) overall relative risks at postoperative 6 months. (B) overall relative risks at postoperative 12 months. (C) the relative risk in subgroup of different evaluation indexes at postoperative 6 months. (D) the relative risk in subgroup of different evaluation indexes at postoperative 12 months.

<https://doi.org/10.1371/journal.pone.0221173.g005>

$p = 0.15$ ; biochemical hypocalcemia  $RR = 0.47$ , 95% CI: 0.20–1.10,  $p = 0.08$ ; symptomatic hypocalcemia  $RR = 0.94$ , 95% CI: 0.43–2.07,  $p = 0.887$ ; Fig 4B). The heterogeneities were both statistically significant in the biochemical hypoparathyroidism subgroup and in the biochemical hypocalcemia subgroup (Fig 4B). The publication bias was also statistically significant (Begg,  $p = 0.048$ ; Egger,  $p = 0.02$ ).

Because permanent hypoparathyroidism consisted of the evaluation indexes at 6 months and 12 months postoperatively, the pooled RRs for the risk of hypoparathyroidism are displayed in Fig 5 according to the time of evaluation. The pooled RRs for hypoparathyroidism at 6 months and 12 months postoperatively were 0.96 (95% CI: 0.52–1.76,  $p = 0.886$ ; Begg,  $p = 0.625$ ; Egger,  $p = 0.287$ ; Fig 5A) and 0.93 (95% CI: 0.49–1.75,  $p = 0.816$ ; Begg,  $p = 0.061$ ; Egger,  $p = 0.042$ ; Fig 5B). The pooled RRs for biochemical hypoparathyroidism, biochemical hypocalcemia, and symptomatic hypocalcemia were 1.06 (95% CI: 0.44–2.58,  $p = 0.894$ , Fig 5C), 0.71 (95% CI: 0.22–2.29,  $p = 0.561$ , Fig 5C), and 1.41 (95% CI: 0.51–3.90,  $p = 0.511$ , Fig 5C) at 6 months postoperatively, 1.89 (95% CI: 1.33–2.69,  $p < 0.001$ , Fig 5D), 0.25 (95% CI: 0.09–0.69,  $p = 0.008$ , Fig 5D), and 0.56 (95% CI: 0.11–2.91,  $p = 0.49$ , Fig 5D) at 12 months postoperatively.

### The number of autoplasic parathyroid glands and the risk of hypoparathyroidism

Fig 6 presents the pooled RRs related to the different number of autoplasic parathyroid glands and the risk of postoperative hypoparathyroidism. The incidence of postoperative hypoparathyroidism in the group where the patients underwent two or more parathyroid gland autotransplantations was higher than that in the group where the patients underwent one or fewer parathyroid gland autotransplantations ( $RR = 1.55$ , 95% CI: 1.09–2.20,  $p = 0.014$ ; Begg,  $p = 0.602$ ; Egger,  $p = 0.863$ ; Fig 6A), that in the group where the patients underwent 1 parathyroid gland autotransplantation ( $RR = 1.71$ , 95% CI: 1.23–2.37,  $p = 0.001$ ; Begg,  $p = 0.548$ ; Egger,  $p = 0.371$ ; Fig 6B), and that in the group where the patients did not undergo parathyroid gland autotransplantation ( $RR = 2.22$ , 95% CI: 1.43–3.45,  $p < 0.001$ ; Begg,  $p = 0.711$ ; Egger,  $p = 0.861$ ; Fig 6C). The incidence of postoperative hypoparathyroidism in the group where the



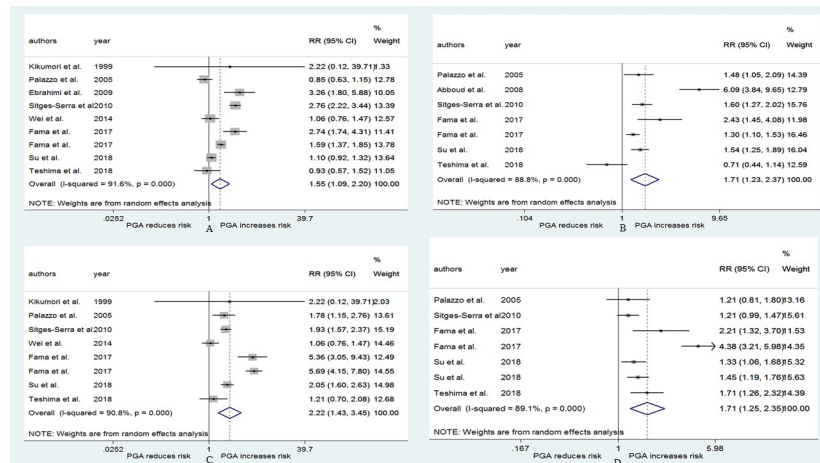

**Fig 6. RR for postoperative hypoparathyroidism in patients who underwent different number of PGA. (A) two or more vs one or less. (B) two or more vs one. (C) two or more vs zero. (D) one vs zero.**

<https://doi.org/10.1371/journal.pone.0221173.g006>

patients underwent only 1 parathyroid gland autotransplantation was also higher than that in the group where the patients did not undergo autotransplantation (RR = 1.71, 95% CI: 1.25–2.35,  $p = 0.001$ ; Begg,  $p = 0.23$ ; Egger,  $p = 0.328$ ; Fig 6D).

Compared with the group in which patients underwent two or more parathyroid gland autotransplantations, the incidence of permanent hypoparathyroidism was not significantly different in the group in which the patients underwent one or fewer parathyroid gland autotransplantations (RR = 0.69, 95% CI: 0.22–2.14,  $p = 0.523$ ; Begg,  $p = 0.806$ ; Egger,  $p = 0.967$ ; Fig 7A), that in the group in which the patients underwent 1 parathyroid gland autotransplantation (RR = 0.7, 95% CI: 0.21–2.28,  $p = 0.55$ ; Begg,  $p = 0.296$ ; Egger,  $p = 0.278$ ; Fig 7B), and that in the group in which the patients did not undergo parathyroid gland autotransplantation (RR = 0.59, 95% CI: 0.17–2.01,  $p = 0.398$ ; Begg,  $p = 0.296$ ; Egger,  $p = 0.103$ ; Fig 7C). No significant difference in permanent hypoparathyroidism was observed between the group in which patients underwent only 1 parathyroid gland autotransplantation and in the group in which

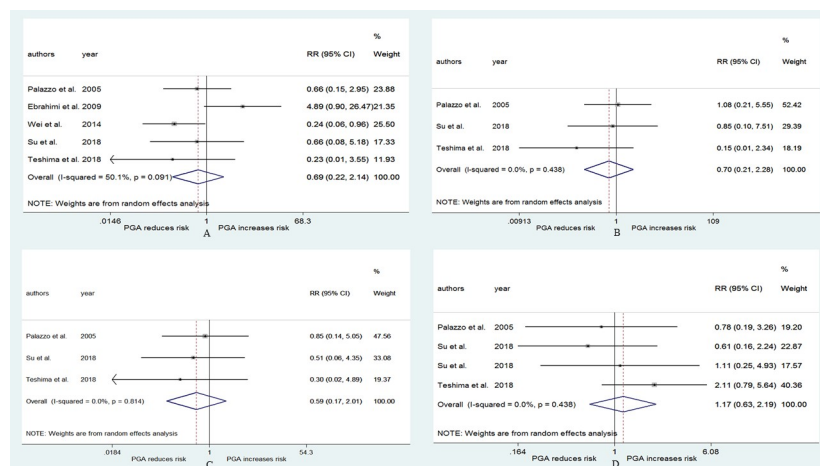

**Fig 7. RR for permanent hypoparathyroidism in patients who underwent different number of PGA. (A) two or more vs one or less. (B) two or more vs one. (C) two or more vs zero. (D) one vs zero.**

<https://doi.org/10.1371/journal.pone.0221173.g007>

the patients did not undergo autotransplantation (RR = 1.17, 95% CI: 0.63–2.19,  $p = 0.617$ ; Begg,  $p > 0.999$ ; Egger,  $p = 0.207$ ; Fig 7D).

## Discussion

PGA was first performed in humans by Lahey in 1926[49] and has become the most common method to preserve the function of the parathyroid gland, which cannot be preserved at its site [16, 41, 46]. In recent years, some surgeons have suggested that PGA should be routinely performed during total thyroidectomy[22–24]. However, there is not adequate evidence for this idea, and it is still unclear whether PGA increases or reduces the incidence of permanent hypoparathyroidism[16, 30, 31, 40, 43, 44]. Therefore, a meta-analysis was conducted to address the controversy to explore the relationship between -PGA and the risk of hypoparathyroidism.

According to this meta-analysis, PGA was associated with increased risk of postoperative hypoparathyroidism. Although the heterogeneity was significant, most of the studies showed similar results[21, 27–31, 39–41, 43, 48]. When the evaluation indexes were measured within one month, especially at 24 hours postoperatively, the function of the autoplasmic parathyroid gland had not recovered, and the parathyroid gland(s) at its site contributed to almost all of the function at the time, so the number of functional parathyroid glands was lower in the group in which the patients underwent PGA than that in the group in which the patients did not undergo PGA. When pooling the RR for the different evaluation indexes to reduce the heterogeneity, we found that the results were consistent with the overall results, especially the results from biochemical hypoparathyroidism, a direct index of parathyroid dysfunction, the heterogeneity for which was no longer statistically significant.

In terms of protracted hypoparathyroidism, which may become a permanent complication, we also confirmed that PGA was associated with increased risk. The parathyroid glands at their sites and the autoplasmic parathyroid glands both had an effect on the parathyroid function at the time, so the relationship between PGA and the risk of protracted hypoparathyroidism was unclear[24, 28, 29, 37–39, 43]. However, we found that the heterogeneity was small across these studies and became zero in the biochemical hypoparathyroidism subgroup when pooling the RR for the risk of protracted hypoparathyroidism. Some studies[50–52] have confirmed that it takes 4 to 14 weeks for the grafted parathyroid to recover function. The phenomenon might be attributed to the speculation that the autoplasmic parathyroid glands did not fully function, especially because the evaluation indexes were measured at 1 month postoperatively in most of the included studies[24, 28, 38, 39, 43].

Regarding permanent hypoparathyroidism, some researchers believed that PGA increased its risk because of the discovery that the autoplasmic parathyroid could not completely recover function[25, 53, 54], and this meta-analysis showed no significant effect from PGA. The same results were obtained in the different evaluation index subgroups. However, the publication bias was statistically significant. We pooled the RRs in the subgroups according to the evaluation time and found that PGA had no effect on the risk of hypoparathyroidism at 6 months and 12 months postoperatively. In addition, publication bias was no longer significant in the subgroup analysis at 6 months postoperatively. We obtained the same results in the different evaluation index subgroups at 6 months postoperatively. However, when combining the RRs at 12 months postoperatively according to the different evaluation indexes, we obtained different and interesting results that showed that PGA increased the risk of biochemical hypoparathyroidism but reduced the risk of biochemical hypocalcemia and had no influence on the risk of symptomatic hypoparathyroidism. The autoplasmic parathyroid glands were fully functioning at 6 months postoperatively, which might explain why the risk of hypoparathyroidism at that time from PGA was reduced compared to that at other time points. Regarding our

observation of the opposite effect of PGA on biochemical hypoparathyroidism and hypocalcemia at 12 months postoperatively, the explanation[21] that various injuries, such as trauma, the loss of some tissue, and hematoma in the receptor site, led to the autoplasmic parathyroid gland not functioning as well as it had before it was transplanted might be not applicable. The autoplasmic parathyroid gland fibrosis and compensation might be responsible for this phenomenon. The parathyroid glands at their sites gradually recovered from surgical trauma and survived, while the autoplasmic parathyroid survived and underwent fibrosis. The latter might be more beneficial for the occurrence of compensation[55, 56], which could lead to hypoparathyroidism but to normal serum calcium. Due to the small statistical differences, the publication bias might also be responsible for the observation of opposite effects.

Some studies have indicated that the incidence of permanent hypoparathyroidism is correlated with the number of autoplasmic parathyroid glands. Several studies[9, 16, 20, 24, 40, 47] have revealed that the autotransplantation of one or more parathyroid glands could effectively reduce the incidence of permanent hypoparathyroidism, and Teshima and coworkers[48] confirmed that the autotransplantation of two or more parathyroid glands could prevent permanent hypoparathyroidism. This meta-analysis showed that when more parathyroid glands underwent autotransplantation, the incidence of postoperative hypoparathyroidism was higher. This was the result of the decrease of parathyroid glands at the site that play a key role in postoperative hypoparathyroidism. The number of autoplasmic parathyroid glands had no connection to the incidence of permanent hypoparathyroidism. The included evaluation indexes were all measured at 6 months postoperatively, when the autoplasmic parathyroid glands were fully functioning.

Substantial heterogeneity was observed among the studies regarding the relationship between PGA and the risk of postoperative, protracted, and permanent hypoparathyroidism, which was a major problem that affected the reliability of the pooled-effect size in the meta-analysis. The results of the subgroup analysis according to the different evaluation indexes of hypoparathyroidism showed that the heterogeneity was much smaller in some subgroups, but that the heterogeneity was high in other groups, suggesting that some other factors served as the sources of heterogeneity. The following factors might have influenced the heterogeneity: 1) diverse methods of serum parathyroid hormone and calcium detection were used; 2) the criteria of biochemical hypoparathyroidism and hypocalcemia in each study were not completely consistent; 3) the characteristics of the populations varied in the different studies; 4) the confounding factors were different across these studies, and some studies did not adjust these factors; and 5) the quality of each study (NOS score) was not completely consistent.

There are several limitations to this meta-analysis. First, because all included studies were cohort studies or case-control studies and high-quality randomized controlled trials had not been conducted, bias was inevitable. Second, the heterogeneity was still significant in some subgroups after the subgroup analysis was performed. Third, although little evidence of publication bias was observed in most of the groups, publication bias was observed in the permanent hypoparathyroidism group and was borderline in the subgroup that was at 12 months postoperatively. Finally, the reason for the observations of the opposite effect of PGA on biochemical hypoparathyroidism and on hypocalcemia at 12 months postoperatively was not completely clear.

## Conclusions

This meta-analysis suggests that PGA was significantly associated with increased risk of postoperative and protracted hypoparathyroidism. Due to the different effects on the risk of hypoparathyroidism at 6 months and 12 months postoperatively and the opposite influence on

biochemical hypoparathyroidism and hypocalcemia at 12 months postoperatively, the relationship between PGA and permanent hypoparathyroidism is unclear. And the evidence for routine PGA is not abundant. Considering the limitations of our meta-analysis, further studies are needed to validate and to perfect these findings.

## Supporting information

**S1 Table. PRISMA checklist.**

(DOC)

**S1 Fig. PRISMA flow diagram.**

(DOC)

## Author Contributions

**Conceptualization:** Bin Wang, Chun-Rong Zhu, Jian Wu.

**Data curation:** Bin Wang, Chun-Rong Zhu.

**Formal analysis:** Bin Wang, Chun-Rong Zhu.

**Funding acquisition:** Jian Wu.

**Investigation:** Bin Wang, Chun-Rong Zhu.

**Methodology:** Bin Wang, Chun-Rong Zhu.

**Project administration:** Hong Liu, Jian Wu.

**Resources:** Hong Liu, Jian Wu.

**Software:** Bin Wang, Chun-Rong Zhu.

**Supervision:** Hong Liu, Jian Wu.

**Validation:** Jian Wu.

**Visualization:** Bin Wang, Hong Liu.

**Writing – original draft:** Bin Wang, Chun-Rong Zhu, Hong Liu.

**Writing – review & editing:** Bin Wang, Chun-Rong Zhu, Hong Liu, Jian Wu.

## References

1. Leenhardt L, Bernier MO, Boin-Pineau MH, Conte Devolx B, Marechaud R, Niccoli-Sire P, et al. Advances in diagnostic practices affect thyroid cancer incidence in France. *Eur J Endocrinol.* 2004; 150(2):133–9. PMID: [14763910](#).
2. Jung KW, Won YJ, Kong HJ, Oh CM, Seo HG, Lee JS. Cancer statistics in Korea: incidence, mortality, survival and prevalence in 2010. *Cancer Res Treat.* 2013; 45(1):1–14. doi: [10.4143/crt.2013.45.1.1](#). PMID: [23613665](#); PubMed Central PMCID: PMC3629358.
3. Dal Maso L, Lise M, Zambon P, Falcini F, Crocetti E, Serraino D, et al. Incidence of thyroid cancer in Italy, 1991–2005: time trends and age-period-cohort effects. *Ann Oncol.* 2011; 22(4):957–63. doi: [10.1093/annonc/mdq467](#). PMID: [20952599](#).
4. Liu YQ, Zhang SQ, Chen WQ, Chen LL, Zhang SW, Zhang XD, et al. [Trend of incidence and mortality on thyroid cancer in China during 2003–2007]. *Zhonghua Liu Xing Bing Xue Za Zhi.* 2012; 33(10):1044–8. PMID: [23290848](#).
5. Lim H, Devesa SS, Sosa JA, Check D, Kitahara CM. Trends in Thyroid Cancer Incidence and Mortality in the United States, 1974–2013. *JAMA.* 2017; 317(13):1338–48. doi: [10.1001/jama.2017.2719](#). PMID: [28362912](#).

6. Morris LG, Tuttle RM, Davies L. Changing Trends in the Incidence of Thyroid Cancer in the United States. *JAMA Otolaryngol Head Neck Surg.* 2016; 142(7):709–11. doi: [10.1001/jamaoto.2016.0230](https://doi.org/10.1001/jamaoto.2016.0230). PMID: [27078686](https://pubmed.ncbi.nlm.nih.gov/27078686/); PubMed Central PMCID: PMC4956490.
7. Davies L, Welch HG. Current thyroid cancer trends in the United States. *JAMA Otolaryngol Head Neck Surg.* 2014; 140(4):317–22. doi: [10.1001/jamaoto.2014.1](https://doi.org/10.1001/jamaoto.2014.1). PMID: [24557566](https://pubmed.ncbi.nlm.nih.gov/24557566/).
8. Sosa JA, Hanna JW, Robinson KA, Lanman RB. Increases in thyroid nodule fine-needle aspirations, operations, and diagnoses of thyroid cancer in the United States. *Surgery.* 2013; 154(6):1420–6; discussion 6–7. doi: [10.1016/j.surg.2013.07.006](https://doi.org/10.1016/j.surg.2013.07.006). PMID: [24094448](https://pubmed.ncbi.nlm.nih.gov/24094448/).
9. Abboud B, Sleilaty G, Zeineddine S, Braidy C, Aouad R, Tohme C, et al. Is therapy with calcium and vitamin D and parathyroid autotransplantation useful in total thyroidectomy for preventing hypocalcemia? *Head Neck.* 2008; 30(9):1148–5. <https://doi.org/10.1002/hed.20836> PMID: [18446819](https://pubmed.ncbi.nlm.nih.gov/18446819/)
10. Kirdak T, Dundar HZ, Uysal E, Ocakoglu G, Korun N. Outcomes of Parathyroid Autotransplantation During Total Thyroidectomy: A Comparison with Age- and Sex-Matched Controls. *J Invest Surg.* 2017; 30(3):201–9. doi: [10.1080/08941939.2016.1232768](https://doi.org/10.1080/08941939.2016.1232768). PMID: [27700191](https://pubmed.ncbi.nlm.nih.gov/27700191/).
11. Giordano D, Valcavi R, Thompson GB, Pedroni C, Renna L, Gradoni P, et al. Complications of central neck dissection in patients with papillary thyroid carcinoma: results of a study on 1087 patients and review of the literature. *Thyroid.* 2012; 22(9):911–7. doi: [10.1089/thy.2012.0011](https://doi.org/10.1089/thy.2012.0011). PMID: [22827494](https://pubmed.ncbi.nlm.nih.gov/22827494/).
12. Bliss RD, Gauger PG, Delbridge LW. Surgeon's approach to the thyroid gland: surgical anatomy and the importance of technique. *World J Surg.* 2000; 24(8):891–7. PMID: [10865032](https://pubmed.ncbi.nlm.nih.gov/10865032/).
13. Fahad Al-Dhahri S, Al-Ghonaim YA, Suliman Terkawi A. Accuracy of postthyroidectomy parathyroid hormone and corrected calcium levels as early predictors of clinical hypocalcemia. *J Otolaryngol Head Neck Surg.* 2010; 39(4):342–8. PMID: [20642997](https://pubmed.ncbi.nlm.nih.gov/20642997/).
14. Bhattacharyya N, Fried MP. Assessment of the morbidity and complications of total thyroidectomy. *Arch Otolaryngol Head Neck Surg.* 2002; 128(4):389–92. PMID: [11926912](https://pubmed.ncbi.nlm.nih.gov/11926912/).
15. Testini M, Gurrado A, Lissidini G, Nacchiero M. Hypoparathyroidism after total thyroidectomy. *Minerva Chir.* 2007; 62(5):409–15. PMID: [17947951](https://pubmed.ncbi.nlm.nih.gov/17947951/).
16. Palazzo FF, Sywak MS, Sidhu SB, Barraclough BH, Delbridge LW. Parathyroid autotransplantation during total thyroidectomy: does the number of glands transplanted affect outcome? *World J Surg.* 2005; 29(5):629–31. doi: [10.1007/s00268-005-7729-9](https://doi.org/10.1007/s00268-005-7729-9). PMID: [15827848](https://pubmed.ncbi.nlm.nih.gov/15827848/).
17. Salander H, Tisell LE. Latent hypoparathyroidism in patients with autotransplanted parathyroid glands. *American journal of surgery.* 1980; 139(3):385–8. [https://doi.org/10.1016/0002-9610\(80\)90299-8](https://doi.org/10.1016/0002-9610(80)90299-8) PMID: [7362009](https://pubmed.ncbi.nlm.nih.gov/7362009/)
18. Shaha AR, Burnett C, Jaffe BM. Parathyroid autotransplantation during thyroid surgery. *Journal of Surgical Oncology.* 1991; 46(1):21–4. <http://dx.doi.org/10.1002/jso.2930460106>. PMID: [1986142](https://pubmed.ncbi.nlm.nih.gov/1986142/)
19. Salander H, Tisell LE. Incidence of hypoparathyroidism after radical surgery for thyroid carcinoma and autotransplantation of parathyroid glands. *American Journal of Surgery.* 1977; 134(3):358–62. [https://doi.org/10.1016/0002-9610\(77\)90406-8](https://doi.org/10.1016/0002-9610(77)90406-8) PMID: [900338](https://pubmed.ncbi.nlm.nih.gov/900338/)
20. Wei T, Li Z, Jin J, Chen R, Gong Y, Du Z, et al. Autotransplantation of Inferior Parathyroid glands during central neck dissection for papillary thyroid carcinoma: A retrospective cohort study. *Int J Surg.* 2014; 12(12):1286–90. <https://doi.org/10.1016/j.ijssu.2014.11.001> PMID: [25448646](https://pubmed.ncbi.nlm.nih.gov/25448646/)
21. Su A, Gong Y, Wu W, Gong R, Li Z, Zhu J. Effect of autotransplantation of a parathyroid gland on hypoparathyroidism after total thyroidectomy. *Endocrine Connections.* 2018; 7(2):286–94. <https://doi.org/10.1530/EC-17-0313> PMID: [29301864](https://pubmed.ncbi.nlm.nih.gov/29301864/)
22. Zedenius J, Wadstrom C, Delbridge L. Routine autotransplantation of at least one parathyroid gland during total thyroidectomy may reduce permanent hypoparathyroidism to zero. *Aust N Z J Surg.* 1999; 69(11):794–7. <https://doi.org/10.1046/j.1440-1622.1999.01697.x> PMID: [10553968](https://pubmed.ncbi.nlm.nih.gov/10553968/).
23. Wei T, Li Z, Chen R, Gong Y, Du Z, Gong R, et al. Routine autotransplantation of inferior parathyroids in central neck dissection of papillary thyroid carcinoma (PN1) is better for the prevention of permanent hypoparathyroidism and reduction of central neck lymph node recurrence. *Thyroid.* 2013; 23(SUPPL. 1):A90–A1. <http://dx.doi.org/10.1089/thy.2013.2310.abs>.
24. Ahmed N, Aurangzeb M, Muslim M, Zarin M. Routine parathyroid autotransplantation during total thyroidectomy: A procedure with predictable outcome. *Journal of the Pakistan Medical Association.* 2013; 63(2):190–3. PMID: [23894893](https://pubmed.ncbi.nlm.nih.gov/23894893/)
25. Kihara M, Miyauchi A, Kontani K, Yamauchi A, Yokomise H. Recovery of parathyroid function after total thyroidectomy: long-term follow-up study. *ANZ J Surg.* 2005; 75(7):532–6. doi: [10.1111/j.1445-2197.2005.03435.x](https://doi.org/10.1111/j.1445-2197.2005.03435.x). PMID: [15972040](https://pubmed.ncbi.nlm.nih.gov/15972040/).
26. Ebrahimi H, Edhouse P, Lundgren CI, McMullen T, Sidhu S, Sywak M, et al. Does autoimmune thyroid disease affect parathyroid autotransplantation and survival? *ANZ Journal of Surgery.* 2009; 79(5):383–5. <https://doi.org/10.1111/j.1445-2197.2009.04894.x> PMID: [19566522](https://pubmed.ncbi.nlm.nih.gov/19566522/)

27. White MG, James BC, Nocon C, Nagar S, Kaplan EL, Angelos P, et al. One-hour PTH after thyroidectomy predicts symptomatic hypocalcemia. *Journal of Surgical Research*. 2016; 201(2):473–9. <https://doi.org/10.1016/j.jss.2015.11.028> PMID: 27020834
28. Lorente-Poch L, Sancho JJ, Ruiz S, Sitges-Serra A. Importance of in situ preservation of parathyroid glands during total thyroidectomy. *The British journal of surgery*. 2015; 102(4):359–67. <https://doi.org/10.1002/bjs.9676> PMID: 25605285
29. Sonne-Holm E, Holst Hahn C. Prolonged Duration of Surgery Predicts Postoperative Hypoparathyroidism among Patients Undergoing Total Thyroidectomy in a Tertiary Referral Centre. *European Thyroid Journal*. 2017; 6(5):255–62. <https://doi.org/10.1159/000470840> PMID: 29071238
30. Su A, Wang B, Gong Y, Gong R, Li Z, Zhu J. Risk factors of hypoparathyroidism following total thyroidectomy with central lymph node dissection. *Medicine (United States)*. 2017; 96(39):e8162. <http://dx.doi.org/10.1097/MD.00000000000008162>.
31. Su A, Gong Y, Wu W, Gong R, Li Z, Zhu J. Does the number of parathyroid glands autotransplanted affect the incidence of hypoparathyroidism and recovery of parathyroid function? *Surgery (United States)*. 2018; 164(1):124–9. <http://dx.doi.org/10.1016/j.surg.2017.12.025>.
32. Iorio O, Petrozza V, De Gori A, Bononi M, Porta N, De Toma G, et al. Parathyroid Autotransplantation During thyroid Surgery. Where are we? A Systematic Review on Indications and Results. *J Invest Surg*. 2018:1–8. doi: [10.1080/08941939.2018.1441344](https://doi.org/10.1080/08941939.2018.1441344). PMID: 29658811.
33. Stroup DF, Berlin JA, Morton SC, Olkin I, Williamson GD, Rennie D, et al. Meta-analysis of observational studies in epidemiology: a proposal for reporting. Meta-analysis Of Observational Studies in Epidemiology (MOOSE) group. *JAMA*. 2000; 283(15):2008–12. <https://doi.org/10.1001/jama.283.15.2008> PMID: 10789670.
34. Stang A. Critical evaluation of the Newcastle-Ottawa scale for the assessment of the quality of nonrandomized studies in meta-analyses. *Eur J Epidemiol*. 2010; 25(9):603–5. doi: [10.1007/s10654-010-9491-z](https://doi.org/10.1007/s10654-010-9491-z). PMID: 20652370.
35. Begg CB, Mazumdar M. Operating characteristics of a rank correlation test for publication bias. *Biometrics*. 1994; 50(4):1088–101. PMID: 7786990.
36. Egger M, Davey Smith G, Schneider M, Minder C. Bias in meta-analysis detected by a simple, graphical test. *BMJ*. 1997; 315(7109):629–34. <https://doi.org/10.1136/bmj.315.7109.629> PMID: 9310563; PubMed Central PMCID: PMC2127453.
37. Gann DS, Paone JF. Delayed hypocalcemia after thyroidectomy for Graves' disease is prevented by parathyroid autotransplantation. *Annals of surgery*. 1979; 190(4):508–13. <https://doi.org/10.1097/0000658-197910000-00010> PMID: 582657
38. Kikumori T, Imai T, Tanaka Y, Oiwa M, Mase T, Funahashi H. Parathyroid autotransplantation with total thyroidectomy for thyroid carcinoma: Long-term follow-up of grafted parathyroid function. *Surgery*. 1999; 125(5):504–8. <http://dx.doi.org/10.1016/S0039-6060%2899%2970201-1>. PMID: 10330938
39. Sitges-Serra A, Ruiz S, Girvent M, Manjon H, Duenas JP, Sancho JJ. Outcome of protracted hypoparathyroidism after total thyroidectomy. *The British journal of surgery*. 2010; 97(11):1687–95. <https://doi.org/10.1002/bjs.7219> PMID: 20730856
40. Sokouti M, Montazeri V, Golzari S. The incidence of transient and permanent hypocalcemia after total thyroidectomy for thyroid cancer. *International Journal of Endocrinology and Metabolism*. 2010; 8(1):7–12.
41. Paek SH, Lee YM, Min SY, Kim SW, Chung KW, Youn YK. Risk factors of hypoparathyroidism following total thyroidectomy for thyroid cancer. *World journal of surgery*. 2013; 37(1):94–101. <https://doi.org/10.1007/s00268-012-1809-4> PMID: 23052805
42. Ito Y, Kihara M, Kobayashi K, Miya A, Miyauchi A. Permanent hypoparathyroidism after completion total thyroidectomy as a second surgery: How do we avoid it? *Endocrine journal*. 2014; 61(4):403–8. PMID: 24476946
43. Lang BH, Chan DT, Chow FC. Visualizing fewer parathyroid glands may be associated with lower hypoparathyroidism following total thyroidectomy. *Langenbecks Arch Surg*. 2016; 401(2):231–8. doi: [10.1007/s00423-016-1386-3](https://doi.org/10.1007/s00423-016-1386-3). PMID: 26892668.
44. Tartaglia F, Blasi S, Giuliani A, Merola R, Livadoti G, Krizzuk D, et al. Parathyroid autotransplantation during total thyroidectomy. Results of a retrospective study. *Int J Surg*. 2016; 28 Suppl 1:S79–83. doi: [10.1016/j.ijss.2015.05.059](https://doi.org/10.1016/j.ijss.2015.05.059). PMID: 26708849.
45. Uruno T, Ogimi Y, Masaki C, Akaishi J, Hames KY, Tomoda C, et al. Usefulness of intraoperative PTH measurements for predicting permanent hypoparathyroidism after total thyroidectomy. *European Thyroid Journal*. 2016; 5(Supplement 1):113. <http://dx.doi.org/10.1159/000447416>.

46. Fama F, Cicciu M, Polito F, Cascio A, Gioffre-Florio M, Piquard A, et al. Parathyroid Autotransplantation During Thyroid Surgery: A Novel Technique Using a Cell Culture Nutrient Solution. *World J Surg.* 2017; 41(2):457–63. doi: [10.1007/s00268-016-3754-0](https://doi.org/10.1007/s00268-016-3754-0). PMID: [27734084](https://pubmed.ncbi.nlm.nih.gov/27734084/).
47. Su A, Gong Y, Wei T, Gong R, Li Z, Zhu J. A new classification of parathyroid glands to evaluate in situ preservation or autotransplantation during thyroid surgery. *Medicine (Baltimore).* 2018; 97(48):e13231. <https://doi.org/10.1097/MD.0000000000013231> PMID: [30508906](https://pubmed.ncbi.nlm.nih.gov/30508906/)
48. Teshima M, Otsuki N, Morita N, Furukawa T, Shinomiya H, Shinomiya H, et al. Postoperative hypoparathyroidism after total thyroidectomy for thyroid cancer. *Auris Nasus Larynx.* 2018; 45(6):1233–8. <https://doi.org/10.1016/j.anl.2018.04.008> PMID: [29747960](https://pubmed.ncbi.nlm.nih.gov/29747960/)
49. Lahey FH. The transplantation of parathyroids in partial thyroidectomy. *Surgery, Gynecology and Obstetrics.* 1926; 62:508–9.
50. Funahashi H, Satoh Y, Imai T, Ohno M, Narita T, Katoh M, et al. Our technique of parathyroid autotransplantation in operation for papillary thyroid carcinoma. *Surgery.* 1993; 114(1):92–6. PMID: [8356534](https://pubmed.ncbi.nlm.nih.gov/8356534/)
51. El-Sharaky MI, Kahalil MR, Sharaky O, Sakr MF, Fadaly GA, El-Hammadi HA, et al. Assessment of parathyroid autotransplantation for preservation of parathyroid function after total thyroidectomy. *Head and Neck.* 2003; 25(10):799–807. <https://doi.org/10.1002/hed.10278> PMID: [12966503](https://pubmed.ncbi.nlm.nih.gov/12966503/)
52. Lo CY, Tam SC. Parathyroid autotransplantation during thyroidectomy: documentation of graft function. *Arch Surg.* 2001; 136(12):1381–5. <https://doi.org/10.1001/archsurg.136.12.1381> PMID: [11735864](https://pubmed.ncbi.nlm.nih.gov/11735864/).
53. Senapati A, Young AE. Parathyroid autotransplantation. *Br J Surg.* 1990; 77(10):1171–4. <https://doi.org/10.1002/bjs.1800771027> PMID: [2224467](https://pubmed.ncbi.nlm.nih.gov/2224467/).
54. Kihara M, Yokomise H, Miyauchi A, Matsusaka K. Recovery of parathyroid function after total thyroidectomy. *Surg Today.* 2000; 30(4):333–8. doi: [10.1007/s005950050596](https://doi.org/10.1007/s005950050596). PMID: [10795865](https://pubmed.ncbi.nlm.nih.gov/10795865/).
55. Tibell A, Rafael E, Wennberg L, Nordenstrom J, Bergstrom M, Geller RL, et al. Survival of macroencapsulated allogeneic parathyroid tissue one year after transplantation in nonimmunosuppressed humans. *Cell Transplant.* 2001; 10(7):591–9. PMID: [11714193](https://pubmed.ncbi.nlm.nih.gov/11714193/).
56. Erikoglu M, Colak B, Toy H, Gurbilek M. Parathyroid autotransplantation in rats having hypoparathyroidism. *Int J Clin Exp Med.* 2015; 8(9):16328–33. PMID: [26629152](https://pubmed.ncbi.nlm.nih.gov/26629152/); PubMed Central PMCID: [PMC4659040](https://pubmed.ncbi.nlm.nih.gov/PMC4659040/).
